# Supplementary material
Source: publisher figshare collection journal article supplement (https://acs.figshare.com/ndownloader/files/4711522)
Supplement: Supplementary file 1 [file 4711522]

## Supplementary Information

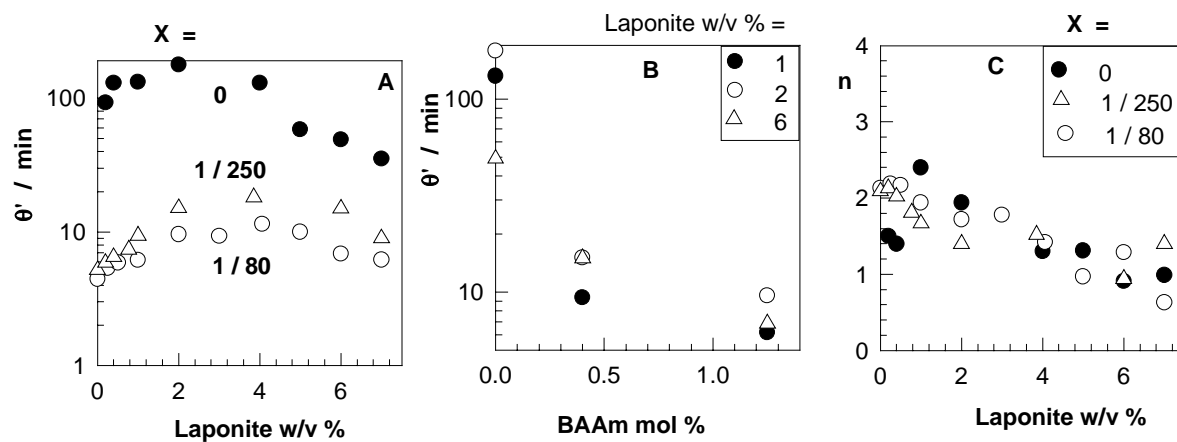

Figure 1: Half-gelation times  $\theta'$  and the coefficient  $n$  of eq 4 shown as functions of clay and BAAM concentrations.
